# Supplementary material for: A refined genome phage display methodology delineates the human antibody response in patients with Chagas disease
Source: PubMed Central journal article supplement (PMC8185243; doi:10.1016/j.isci.2021.102540), 2021-05-15
Supplement: mmc1.pdf [file mmc1.pdf]

**Supplemental information**

**A refined genome phage display methodology**

**delineates the human antibody response**

**in patients with Chagas disease**

**André Azevedo Reis Teixeira, Luis Rodriguez Carnero, Andréia Kuramoto, Fenny Hui Fen Tang, Carlos Hernique Gomes, Natalia Bueno Pereira, Léa Campos de Oliveira, Regina Garrini, Jhonatas Sirino Monteiro, João Carlos Setubal, Ester Cerdeira Sabino, Renata Pasqualini, Walter Colli, Wadih Arap, Maria Júlia Manso Alves, Edécio Cunha-Neto, and Ricardo José Giordano**

**Table S1.** Details for all patients used in this study (Chagas disease stage, gender, age and heart condition). Related to **Fig. 2** and STAR Methods (section: Patients).

| Clinical Stage  | Cohort | Number of individuals | Gender (male/female) | Age<br>(median, min, max) | Ejection fraction (median, min, max) |
|-----------------|--------|-----------------------|----------------------|---------------------------|--------------------------------------|
| Asymptomatic    | A      | 20                    | 3M / 7F              | 57 (42 - 68)              | 0.67 (0.52 - 0.82)                   |
|                 | B      | 20                    | 6F / 4M              | 60 (51 - 83)              | 0.65 (0.53 - 0.81)                   |
| Cardiac light   | A      | 20                    | 6M / 4F              | 53 (40 - 88)              | 0.68 (0.61 - 0.73)                   |
|                 | B      | 20                    | 8F / 2M              | 49 (31 - 73)              | 0.70 (0.60 - 0.72)                   |
| Cardiac chronic | A      | 20*                   | 6M / 4F              | 52 (34 - 88)              | 0.29 (0.18 - 0.35)                   |
|                 | B      | 20*                   | 6F / 4M              | 48 (28 - 69)              | 0.30 (0.18 - 0.35)                   |

\* One female patient, 50 year of age with 0.18 ejection fraction was repeated in both cohorts.

**Table S2.** Sequencing details. Related to **Fig. 2**.

| sample     | # DNA reads <sup>a</sup> | # DNA reads with insert identified <sup>a</sup> | # different DNA inserts <sup>b</sup> | # DNA reads with insert identified (no singleton) <sup>a</sup> | # different DNA inserts (no singleton) <sup>c</sup> | # DNA reads above genome identity cutoff (>=90%) <sup>e</sup> | # different DNA reads above genome identity cutoff (>=90%) <sup>d</sup> | # different DNA inserts encoding a peptide <sup>d</sup> | # different peptides encoded <sup>e</sup> | # peptide reads above proteome similarity cutoff (>=60%) <sup>e</sup> | # different peptide reads above proteome similarity cutoff (>=60%) <sup>f</sup> |
|------------|--------------------------|-------------------------------------------------|--------------------------------------|----------------------------------------------------------------|-----------------------------------------------------|---------------------------------------------------------------|-------------------------------------------------------------------------|---------------------------------------------------------|-------------------------------------------|-----------------------------------------------------------------------|---------------------------------------------------------------------------------|
| Library    | 222,618 (100%)           |                                                 | 222,099 (99%)                        |                                                                |                                                     | 204,453 (92%)                                                 | 204,021 (92%)                                                           |                                                         |                                           |                                                                       |                                                                                 |
| control A  | 453,679 (100%)           | 420,109 (93%)                                   | 126,178 (30%)                        | 330,712 (73%)                                                  | 36,781 (11%)                                        | 321,890 (97%)                                                 | 35,675 (11%)                                                            | 153,266 (48%)                                           | 17,452 (11%)                              | 41,640 (27%)                                                          | 5,496 (31%)                                                                     |
| control B  | 574,892 (100%)           | 541,438 (94%)                                   | 84,675 (16%)                         | 474,143 (82%)                                                  | 17,380 (4%)                                         | 471,831 (100%)                                                | 17,074 (4%)                                                             | 62,358 (13%)                                            | 2,612 (4%)                                | 10,856 (17%)                                                          | 657 (25%)                                                                       |
| asympto. A | 455,717 (100%)           | 426,265 (94%)                                   | 143,331 (34%)                        | 322,852 (71%)                                                  | 39,918 (12%)                                        | 316,664 (98%)                                                 | 38,884 (12%)                                                            | 199,143 (63%)                                           | 20,495 (10%)                              | 78,985 (40%)                                                          | 8,182 (40%)                                                                     |
| asympto. B | 744,082 (100%)           | 704,653 (95%)                                   | 77,529 (11%)                         | 645,124 (87%)                                                  | 18,000 (3%)                                         | 460,752 (71%)                                                 | 17,546 (4%)                                                             | 353,541 (77%)                                           | 7,357 (2%)                                | 200,056 (57%)                                                         | 5,385 (73%)                                                                     |
| mild A     | 868,305 (100%)           | 815,584 (94%)                                   | 214,287 (26%)                        | 656,427 (76%)                                                  | 55,130 (8%)                                         | 645,498 (98%)                                                 | 53,574 (8%)                                                             | 426,686 (66%)                                           | 28,244 (7%)                               | 201,599 (47%)                                                         | 11,472 (41%)                                                                    |
| mild B     | 651,503 (100%)           | 609,289 (94%)                                   | 110,192 (18%)                        | 523,434 (80%)                                                  | 24,337 (5%)                                         | 519,622 (99%)                                                 | 23,979 (5%)                                                             | 248,547 (48%)                                           | 11,628 (5%)                               | 232,266 (93%)                                                         | 10,299 (89%)                                                                    |
| severe A   | 1,134,445 (100%)         | 1,070,739 (94%)                                 | 194,714 (18%)                        | 925,658 (82%)                                                  | 49,633 (5%)                                         | 917,476 (99%)                                                 | 48,464 (5%)                                                             | 675,126 (74%)                                           | 24,341 (4%)                               | 508,482 (75%)                                                         | 10,425 (43%)                                                                    |
| severe B   | 516,823 (100%)           | 497,444 (96%)                                   | 15,363 (3%)                          | 486,343 (94%)                                                  | 4,262 (1%)                                          | 484,296 (100%)                                                | 4,172 (1%)                                                              | 480,049 (99%)                                           | 2,685 (1%)                                | 427,369 (89%)                                                         | 2,195 (82%)                                                                     |

a: relative to # DNA reads

b: relative to # DNA reads with insert identified

c: relative to # DNA reads with insert identified (no singleton)

d: relative to # DNA reads above genome identity cutoff (>=90%)

e: relative to # different DNA inserts encoding a peptide

f: relative to # different peptides encoded

**Table S3.** Antigens with tandem repetitive sequences. The maximum number of repetition units in a single protein is indicated. Related to **Fig. 3 and 6**.

| Repetitive unit              | # repetitions | Antigen                                                           |
|------------------------------|---------------|-------------------------------------------------------------------|
| PKPAE                        | 177           | EAN91735.1 trans-sialidase                                        |
| EEAEARRLA                    | 106           | EAN83595.1 Tb-291 membrane-associated protein-like                |
| EAEERAQR                     | 103           | EAN81788.1 membrane associated protein, putative                  |
| EDVQELVAPA                   | 79            | EAN89929.1 hypothetical protein, conserved                        |
| KQRAAEATKVAEAE               | 76            | EAN93943.1 hypothetical protein                                   |
| PFGQAAAGDKPS                 | 72            | EAN91665.1 surface antigen 2 (CA-2), putative                     |
| GSSMSEGSSEHERSEG             | 65            | EAN86927.1 hypothetical protein                                   |
| PAEPKSAEPK                   | 59            | EAN87106.1 trans-sialidase                                        |
| LAQREADNEKLAED               | 49            | EAN86336.1 myosin heavy chain, putative                           |
| AAGGFGSATTTSAP               | 44            | EAN88361.1 hypothetical protein                                   |
| DSSAHSTPSTPV                 | 40            | EAN84377.1 trans-sialidase                                        |
| ENERLADELEQKAA               | 40            | EAN81003.1 hypothetical protein, conserved                        |
| ERQLQERDDALAALRDRLEEY        | 38            | EAN88119.1 hypothetical protein                                   |
| GREKSALESRSSEVDALAAL         |               |                                                                   |
| LQRQNEELQSQLKESRRGEEKLDA     | 34            | EAN99975.1 antigenic protein, putative                            |
| GFRG                         | 31            | EAN86592.1 nucleolar RNA-binding protein                          |
| AKPPAESPFKNVFGAPSSSTA        | 28            | EAN97077.1 hypothetical protein,                                  |
| GFGDRGGR                     | 24            | EAN95753.1 hypothetical protein                                   |
| TITTKVPTTTTTTTMAPT           | 23            | EAN82230.1 hypothetical protein Tc00.1047053510433.10             |
| ENEELRAEDEHKTRGLQ            | 21            | EAN94898.1 hypothetical protein                                   |
| EVSEQAEDLQRQLEELRA           |               |                                                                   |
| LNDGGQRYSLISVCFVTH           | 21            | EAN84488.1 hypothetical protein                                   |
| WTPNNPELSAAWRNFASSCPHG       |               |                                                                   |
| CCTRLIVFERLLHHTLWSKFLFPI     |               |                                                                   |
| QAARQVEDVQELVA               | 20            | EAN98020.1 hypothetical protein, conserved                        |
| PAENVRELVAPTEDV              |               |                                                                   |
| GPRHVDPDFRSTTQDAYR           | 19            | EAN87716.1 microtubule-associated protein, putative               |
| PVDPSAYKRALPQEEEEEDV         |               |                                                                   |
| VTAEREELAENLRATEDAKAEVERNLES | 17            | EAN84693.1 kinesin-like protein                                   |
| MEPTTITTKAPTTTT              | 17            | EAN82230.1 hypothetical protein                                   |
| GGQRRGGRRDYGDQGNQGDY         | 16            | EAN87685.1 mitochondrial oligo_U binding protein TBRGG1, putative |
| MATDELTTPEARPLDVTVGS         | 14            | EAN94669.1 hypothetical protein Tc00.1047053508119.200            |
| ALLSDSAAVTAPADRDATAAL        |               |                                                                   |
| TNDLQERAAAAEDAARRRC          | 13            | EAN84189.1 hypothetical protein                                   |
| AAAREKEEAARKLEAELEVR         |               |                                                                   |
| KPEEK                        | 11            | EKF26748.1 hypothetical protein                                   |
| SAKKRPAVLSSQEVQAVVNA         | 10            | EAN85405.1 hypothetical protein                                   |
| RRATPRNDEYDDDYESETSA         |               |                                                                   |
| GRGGDRGGFRG                  | 10            | EAN86596.1 nucleolar RNA-binding protein                          |
| KAAAPK                       | 6             | EAN99142.1 60S ribosomal protein L23a, putative                   |
| TTTTTTTTKAP                  | 10            | EAN83649.1 mucin TcMUCI                                           |
| ASASEEGSRGDSSMP              | 9             | EAN98211.1 trans-sialidase, putative                              |
| AAVPDSSSSDDDDAPVR            | 8             | EAN84654.1 hypothetical protein, conserved                        |
| KPAQKAKASPAMRPAPKK           |               |                                                                   |
| STSSTPVGSGAK                 | 8             | EAN85648.1 trans-sialidase                                        |
| NADDARSPLRRQPA               | 8             | EAN85710.1 hypothetical protein, conserved                        |

|                                                                             |   |                                            |
|-----------------------------------------------------------------------------|---|--------------------------------------------|
| ARGQLVGEEREGETCGLHRDAV<br>DSEERAVRRCLERGEAAADELGEEYG<br>SATHERVVEALAAEEDA   | 8 | EAN91803.1 hypothetical protein, conserved |
| KPEDAKPEEK                                                                  | 8 | EAN83891.1 hypothetical protein            |
| TKPVSSPP                                                                    | 8 | EAN91857.1 hypothetical protein, conserved |
| LPKKKGRPKKLNEAEDAEM<br>TLMEEQEEMSAVTEEEAP                                   | 7 | EAN91857.1 hypothetical protein, conserved |
| LTQEVQRLERELEEAREQERA<br>VGATEAMQRDAARERDEAVAA                              | 7 | EAN99422.1 hypothetical protein, conserved |
| LLEKDPRRKAIEAALEESMNAR<br>AQELAREKKLADRAFLDQKPEGVSLR<br>ELPLDDSDVFVAMEQERRQ | 6 | EAN82258.1 calpain cysteine peptidase      |
| RHSENADNVRSPK                                                               | 6 | EAN85710.1 hypothetical protein, conserved |

**Table S4.** Forward and reverse primers used for NGS sample preparation. Related to STAR Methods (section: Large-scale DNA sequencing).

|                        |                                                        |
|------------------------|--------------------------------------------------------|
| <b>FORWARD PRIMERS</b> |                                                        |
| ILLU-PG8-F-0N          | TCGTCGGCAGCGTCAGATGTGTATAAGAGACAGCTGCGCAACACGATGAC     |
| ILLU-PG8-F-1N          | TCGTCGGCAGCGTCAGATGTGTATAAGAGACAGNCTGCGCAACACGATGACC   |
| ILLU-PG8-F-2N          | TCGTCGGCAGCGTCAGATGTGTATAAGAGACAGNNCTGCGCAACACGATGACC  |
| ILLU-PG8-F-3N          | TCGTCGGCAGCGTCAGATGTGTATAAGAGACAGNNCTGCGCAACACGATGACC  |
| <b>REVERSE PRIMERS</b> |                                                        |
| ILLU-PG8-R-0N          | GTCTCGTGGGCTCGGAGATGTGTATAAGAGACAGGTTCCAGTGGGTCCGGATA  |
| ILLU-PG8-R-1N          | GTCTCGTGGGCTCGGAGATGTGTATAAGAGACAGNGTTCAGTGGGTCCGGATA  |
| ILLU-PG8-R-2N          | GTCTCGTGGGCTCGGAGATGTGTATAAGAGACAGNNGTTCAGTGGGTCCGGATA |
| ILLU-PG8-R-3N          | GTCTCGTGGGCTCGGAGATGTGTATAAGAGACAGNNGTTCAGTGGGTCCGGATA |

Cohort A ● Control      Cohort B ● Assymptomatic      Cohort A ● Cardiac mild      Cohort B ● Cardiac Severe

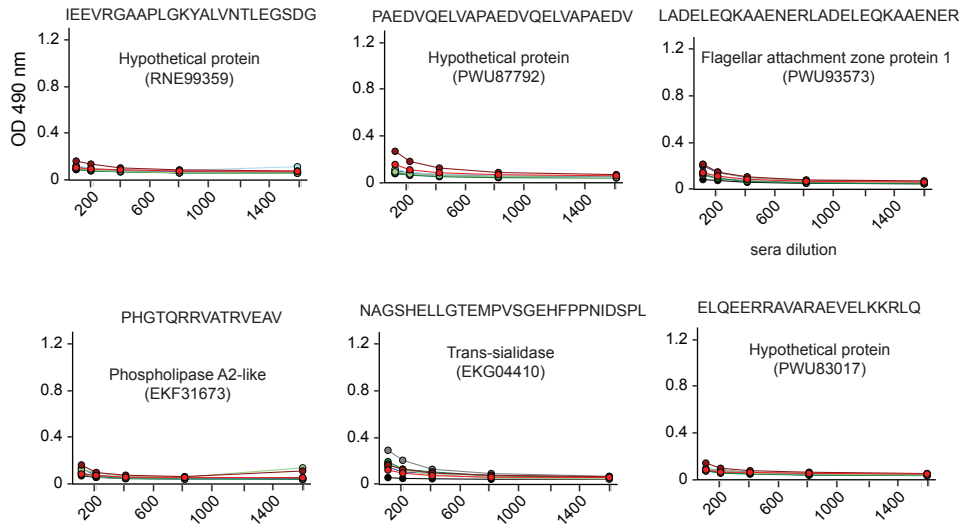

**Figure S1.** Antigen validation. ELISA reactivity of each pool of IgG from both cohorts with synthetic peptides representative of selected clusters of antigens. Related to **Fig. 4**.
